# Supplementary material for: A sustainable freestanding biomechanical energy harvesting smart backpack as a portable-wearable power source
Source: Royal Society of Chemistry journal article supplement (doi:10.1039/c6tc05282g), 2017-01-01
Supplement: c6tc05282g1.pdf [file c6tc05282g1.pdf]

## Supporting information

### **Sustainable Freestanding Biomechanical Energy Harvesting Smart Back Pack as a Portable-Wearable Power Source**

Arunkumar Chandrasekhar,<sup>a</sup> Nagamalleswara Rao Alluri,<sup>b</sup> Venkateswaran Vivekananthan,<sup>c</sup> Yuvasree  
Purusothaman,<sup>d</sup> Sang-Jae Kim<sup>ab\*</sup>

<sup>a,c,d</sup> *Nanomaterials and System Lab, Department of Mechatronics Engineering,  
Jeju National University, Jeju 690-756, Republic of Korea*

<sup>b</sup> *Faculty of Applied Energy System, Department of Mechanical Engineering,  
Jeju National University, Jeju 690-756, Republic of Korea*

\*Corresponding Author,

Prof. Sang-Jae Kim (S-J. Kim),

Fax: 0082-64-756-3886; Tel: 0082-64-754-3715.

E-mail: kimsangj@jejunu.ac.kr

## **Table of Contents**

|                    |                                                                                                                                                           |
|--------------------|-----------------------------------------------------------------------------------------------------------------------------------------------------------|
| <b>Table S1</b>    | <b>Triboelectric series of materials</b>                                                                                                                  |
| <b>Table S2</b>    | <b>Comparison of the proposed SBP-TENG with other reports</b>                                                                                             |
| <b>Figure S1</b>   | <b>Photograph of surface treated petri dish, solidified PDMS and FE-SEM images of PDMS</b>                                                                |
| <b>Figure S2</b>   | <b>FE-SEM images of triboelectric active layer</b>                                                                                                        |
| <b>Figure S3</b>   | <b>Stability test of SBP-TENG</b>                                                                                                                         |
| <b>Figure S4</b>   | <b>FE-SEM image of PDMS film after few cycles of operations</b>                                                                                           |
| <b>Figure S5</b>   | <b>Short circuit current obtained during various force applied on the SBP-TENG</b>                                                                        |
| <b>Figure S6</b>   | <b>Output voltage with respect to different human motion vs different bag weight with error limits of real time bio-mechanical energy.</b>                |
| <b>Figure S7</b>   | <b>Output current with respect to different human motion vs different bag weight with error limits of real time bio-mechanical energy.</b>                |
| <b>Figure S8</b>   | <b>Frequency components after Fourier transformed of the harvested voltage during human motion (walking, running, and bending).</b>                       |
| <b>Figure S9.</b>  | <b>Capacitor charging circuit using multi unit-SBP-TENG</b>                                                                                               |
| <b>Figure S10.</b> | <b>Output voltage of multi-unit SBP-TENG with respect to walking motion vs different bag weight with error limits of real time bio-mechanical energy.</b> |
| <b>Figure S11.</b> | <b>Output current of multi-unit SBP-TENG with respect to walking motion vs different bag weight with error limits of real time bio-mechanical energy.</b> |
| <b>Figure S12.</b> | <b>Self-powered emergency LED light switching circuit</b>                                                                                                 |

### Calculation of the applied force

Here the external force using a linear motor. Hence, the force were calculated with equation,

$$F = m \times a \quad - (1)$$

F = Force

m = Mass

a = Acceleration

### Example:

$$m = 2.144 \text{ Kg}$$

$$a = 10 \text{ m/s}$$

Hence,

$$F = 2.144 \text{ Kg} \times 10 \text{ m/s}$$

$$\mathbf{F = 21.44 \text{ N}}$$

### Calculation of peak power and power density

$$Power = I^2 \times R \quad - (2)$$

$$\mathbf{Power\ Density = Power / Area} \quad - (3)$$

| <b>No</b> | <b>Materials</b>    | <b>Triboelectric charge</b> | <b>Role of Action</b>   |
|-----------|---------------------|-----------------------------|-------------------------|
| <b>1</b>  | <b>Aluminum</b>     |                             | <b>Electrode</b>        |
| <b>2</b>  | <b>Copper</b>       |                             | <b>Electrode</b>        |
| <b>3</b>  | <b>Wool</b>         | <b>Positive</b>             | <b>Contact Material</b> |
| <b>4</b>  | <b>Paper</b>        | <b>Positive</b>             | <b>Contact Material</b> |
| <b>5</b>  | <b>Jeans</b>        | <b>Positive</b>             | <b>Contact Material</b> |
| <b>6</b>  | <b>Polyethylene</b> | <b>Negative</b>             | <b>Contact Material</b> |
| <b>7</b>  | <b>PDMS</b>         | <b>Negative</b>             | <b>Active layer</b>     |

**Table S1.** Triboelectric series: a list that rank various materials used for the SBP-TENG electrical studies, according to their tendency to lose electrons (positive) and gain (negative).

| No | Device        | Application                                                                                                             | Mode of operation                         | Active layer | Contact material | V <sub>oc</sub> | I <sub>sc</sub>              | Area                     | Ref                 |
|----|---------------|-------------------------------------------------------------------------------------------------------------------------|-------------------------------------------|--------------|------------------|-----------------|------------------------------|--------------------------|---------------------|
| 1  | TESM          | Self-Powered High-Resolution and Pressure-Sensitive Triboelectric Sensor Matrix for Real-Time Tactile Mapping           | Single electrode (Contact and separation) | PDMS         | Aluminum         | 17 V            | 150 nA                       | 1 cm <sup>2</sup>        | <sup>1</sup>        |
| 2  | TF-TENG       | Transparent and Flexible Self-Charging Power Film and Its Application in a Sliding Unlock System in Touchpad Technology | Sliding mode                              | FEP          | Human finger     | 31.5 V          | 224 nA                       | ----                     | <sup>2</sup>        |
| 3  | BD-TENG       | Biodegradable triboelectric nanogenerator as a life-time designed implantable power source                              | Contact and separation                    | BDP1         | BDP1             | 40 V            | 1 $\mu$ A                    | 6 cm <sup>2</sup>        | <sup>3</sup>        |
| 4  | KFE           | Personalized Keystroke Dynamics for Self-Powered Human Machine Interfacing                                              | Contact and separation                    | FEP          | Human finger     | 26.8V           | 23.5 $\mu$ A                 | -----                    | <sup>4</sup>        |
| 5  | SR-based TENG | Stretchable-Rubber-Based Triboelectric Nanogenerator and Its Application as Self-Powered Body Motion Sensors            | Sliding motion                            | Rubber       | Aluminum         | 65 V            | 7.5 $\mu$ A m <sup>-2</sup>  | 29.04 cm <sup>2</sup>    | <sup>5</sup>        |
| 6  | HMI           | Triboelectrification Based Motion Sensor for Human-Machine Interfacing                                                  | Contact and separation                    | PDMS         | Human Skin       | 42.6 V          | 0.2 $\mu$ A                  | -----                    | <sup>6</sup>        |
| 7  | SS-TENG       | Human Interactive Triboelectric Nanogenerator as a Self-Powered Smart Seat                                              | Contact and separation                    | Kapton film  | News Paper       | 13 V            | 1.75 $\mu$ A                 | 25 cm <sup>2</sup>       | <sup>7</sup>        |
| 8  | SBP-TENG      | <b>Sustainable Freestanding Biomechanical Energy Harvesting Smart Back Pack as a Portable-Wearable Power Source</b>     | <b>Contact and separation</b>             | <b>PDMS</b>  | <b>Wool</b>      | <b>142 V</b>    | <b>5.9 <math>\mu</math>A</b> | <b>12 Cm<sup>2</sup></b> | <b>Present work</b> |

**Table S2.** Comparison of the proposed SBP-TENG with other reports

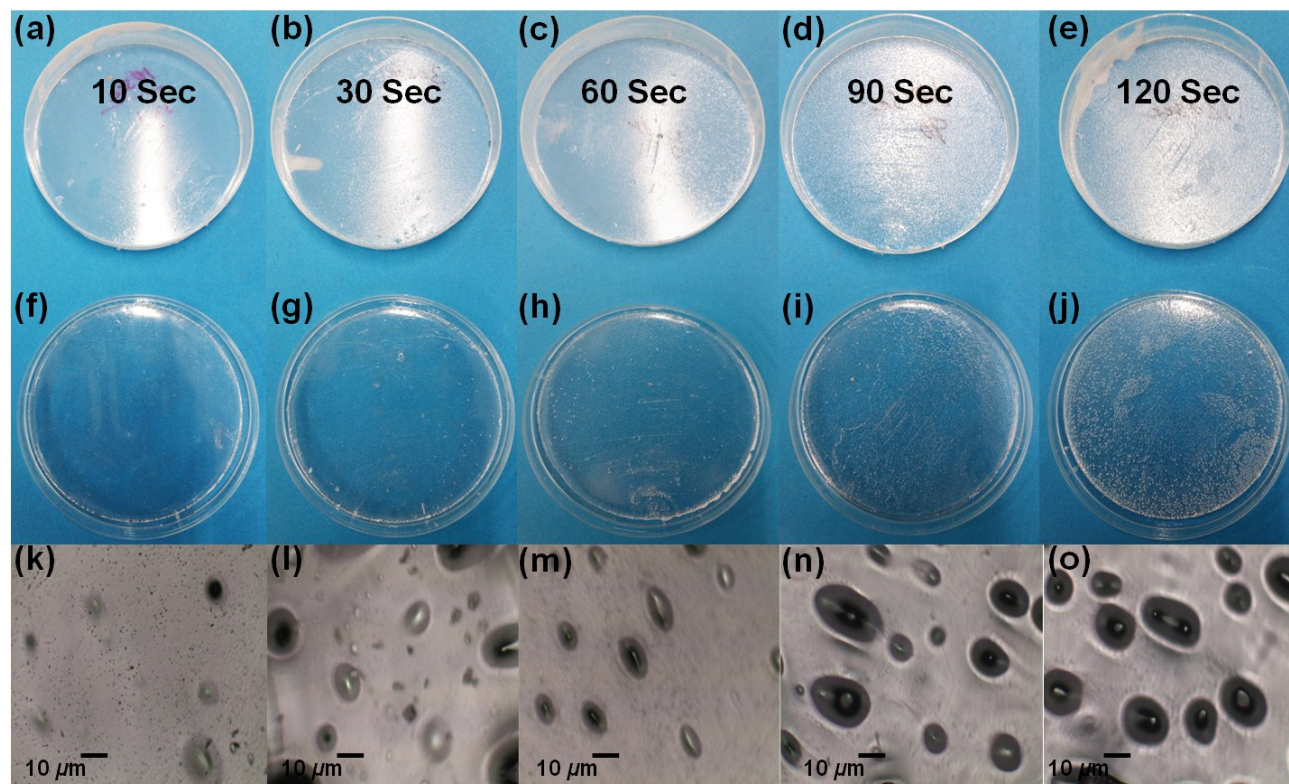

**Figure S1.** (a-e) Photograph of surface treated ABS plastic petri dish with acetone at different timing (10 – 120 sec). (f-j) Photograph of surface modified PDMS after solidification. (k-o) Top view FE-SEM image of surface modified PDMS.

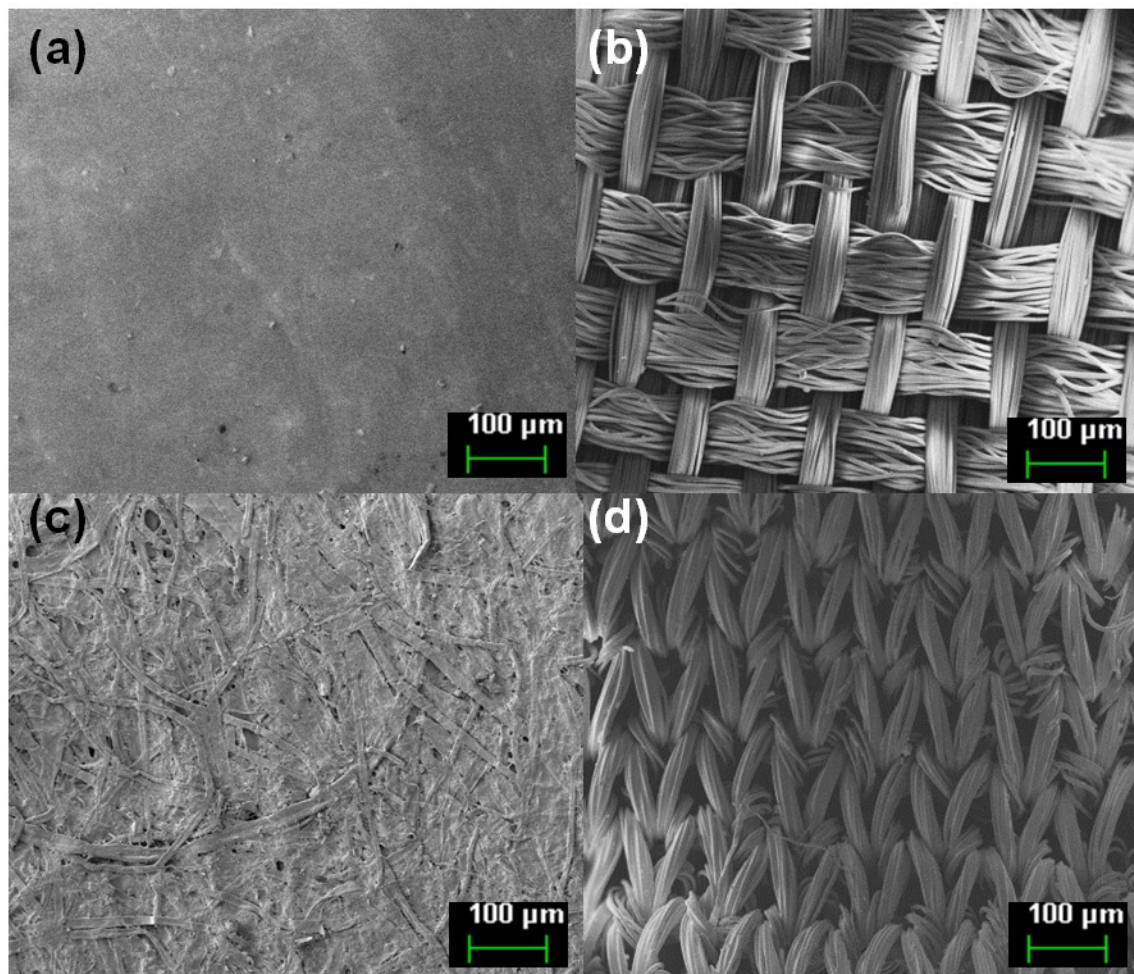

**Figure S2.** (a-d) Top view FE-SEM image of positively charged triboelectric contact materials: polyethylene, jeans, paper and wool.

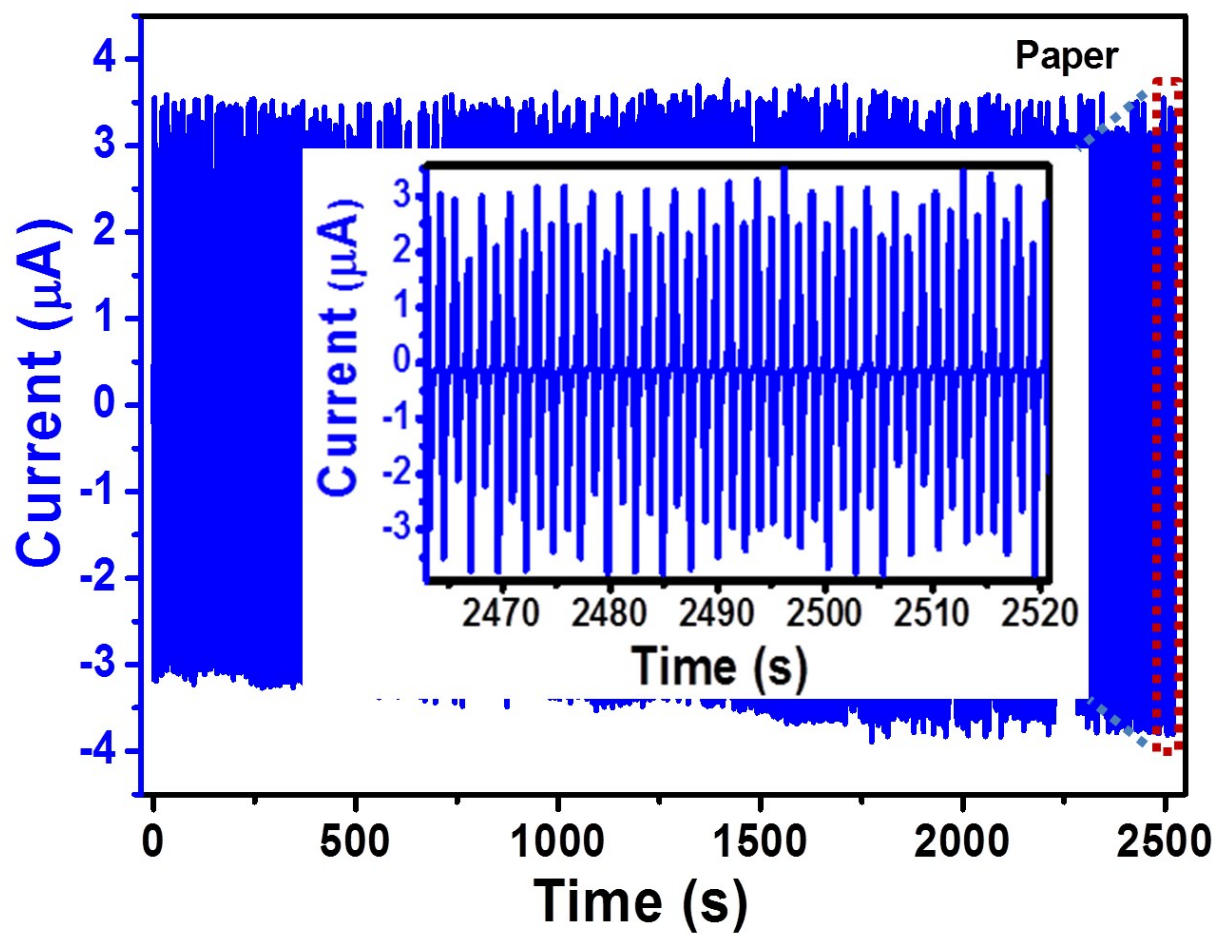

**Figure S3.** Stability test of SBP-TENG (a) Short circuit current. The inset shows an enlarged view of the electrical response at the end of the stability test and (inset).



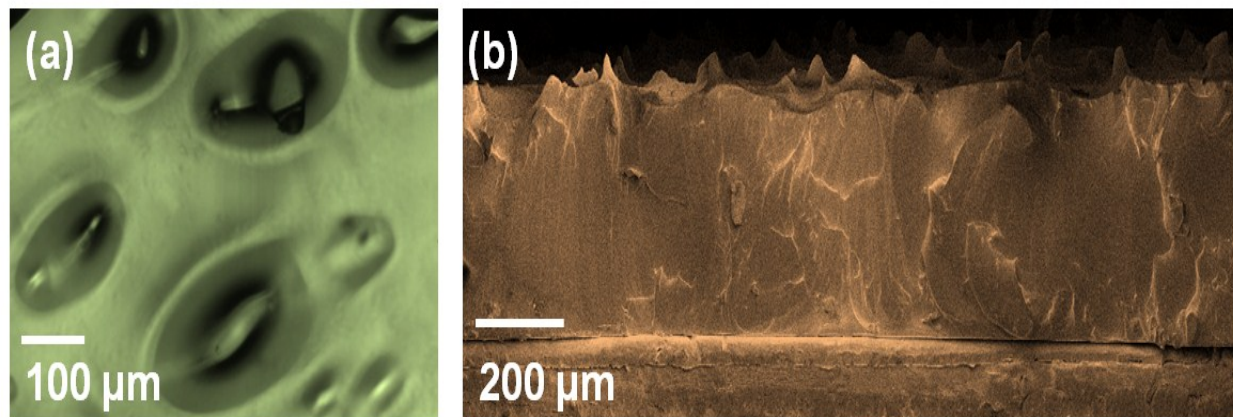

**Figure S4.** (a) Top view FE-SEM image of PDMS film (peeled from 120 sec treated petri dish) and (b) its cross-sectional view.

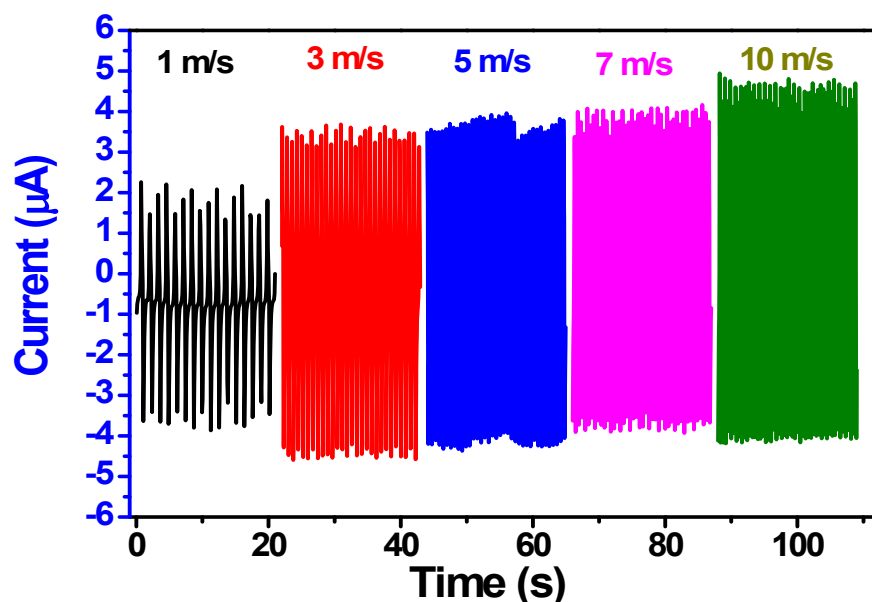

**Figure S5.** Short circuit current obtained during various force applied on the SBP-TENG.

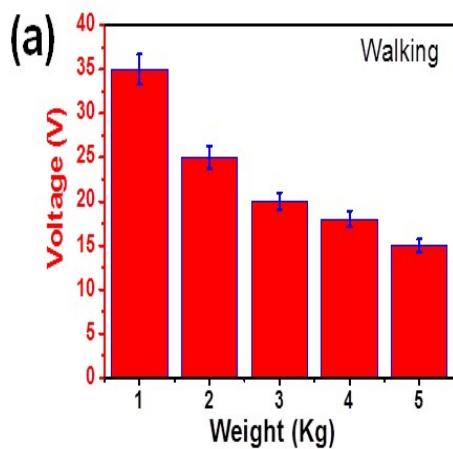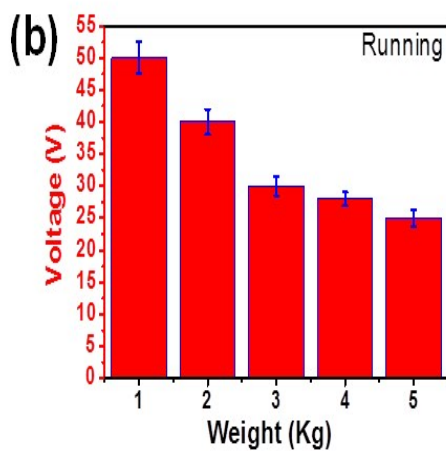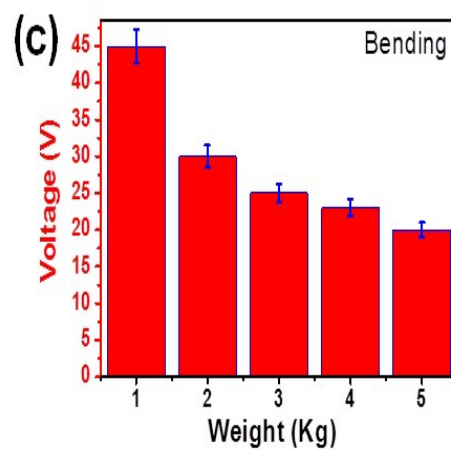

**Figure S6.** (a-c) Output voltage with respect to different human motion (walking, running and bending) vs different bag weight with error limits of real time bio-mechanical energy.

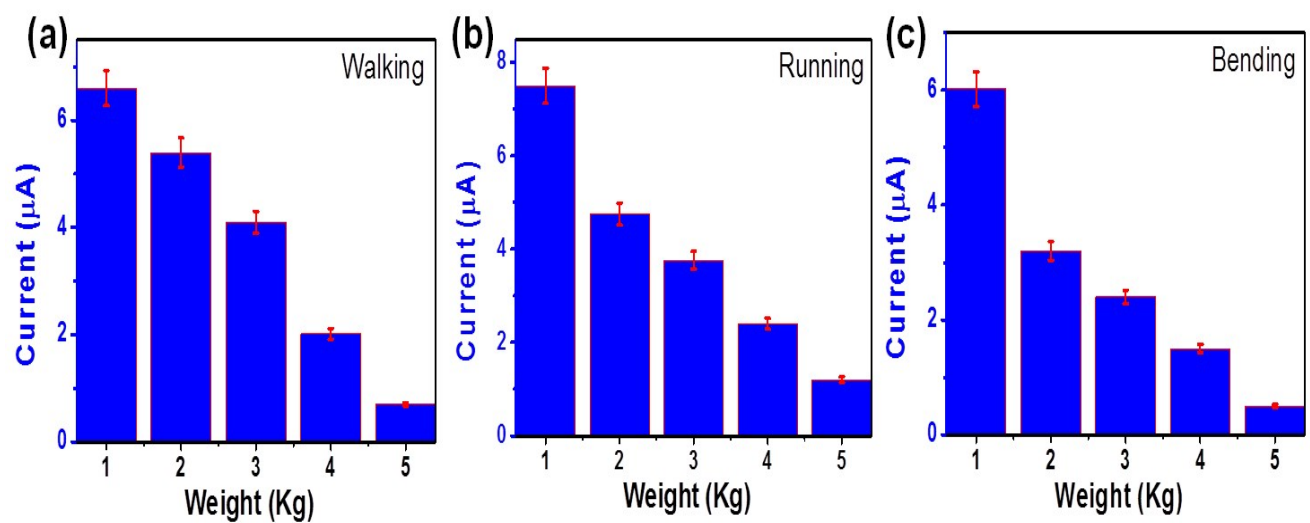

**Figure S7.** (a-c) Output current with respect to different human motion (walking, running and bending) vs different bag weight with error limits of real time bio-mechanical energy.

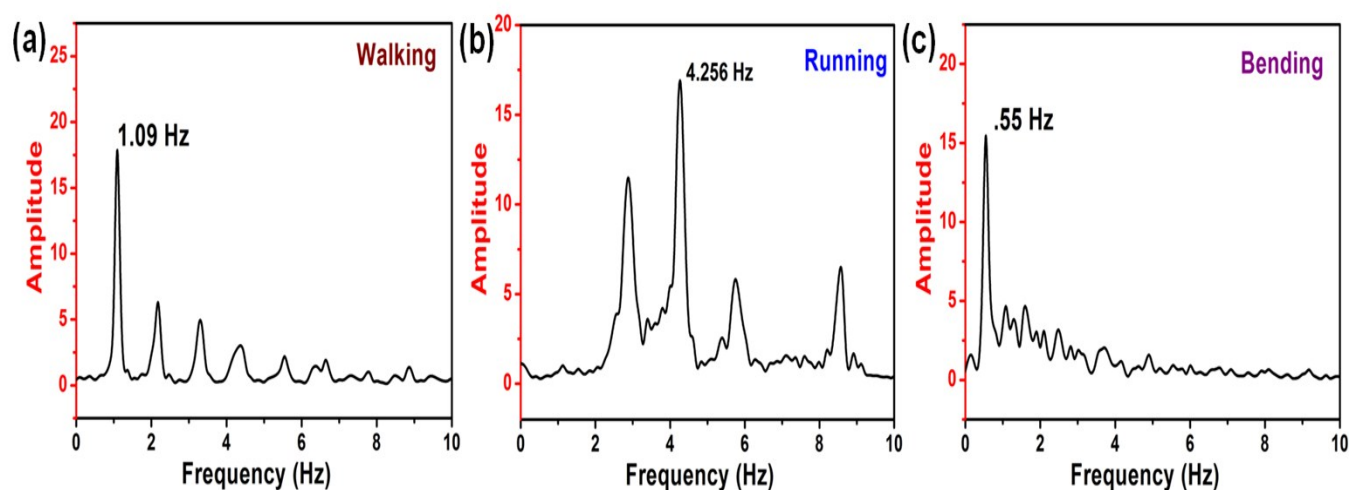

**Figure S8.** (a-c) the frequency components after Fourier transformed of the harvested voltage during human motion (walking, running and bending).

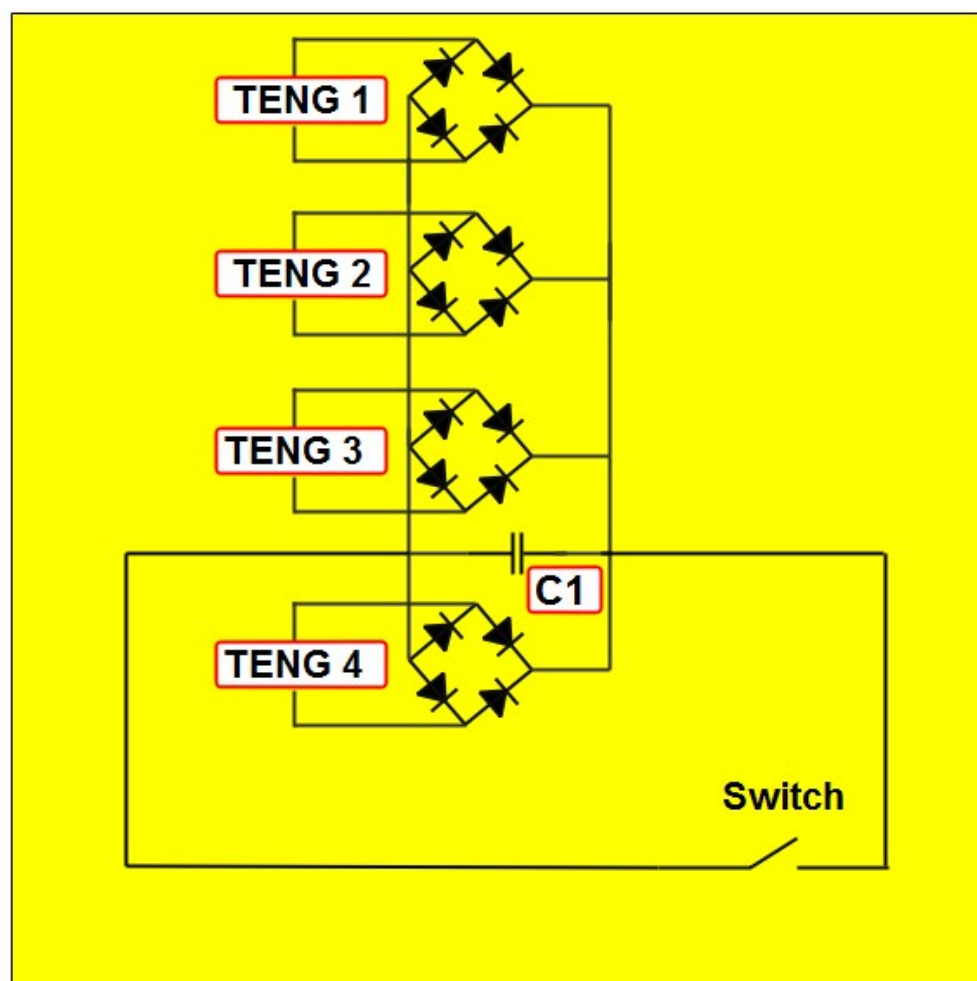

**Figure S9.** Capacitor charging circuit using multi unit-SBP-TENG

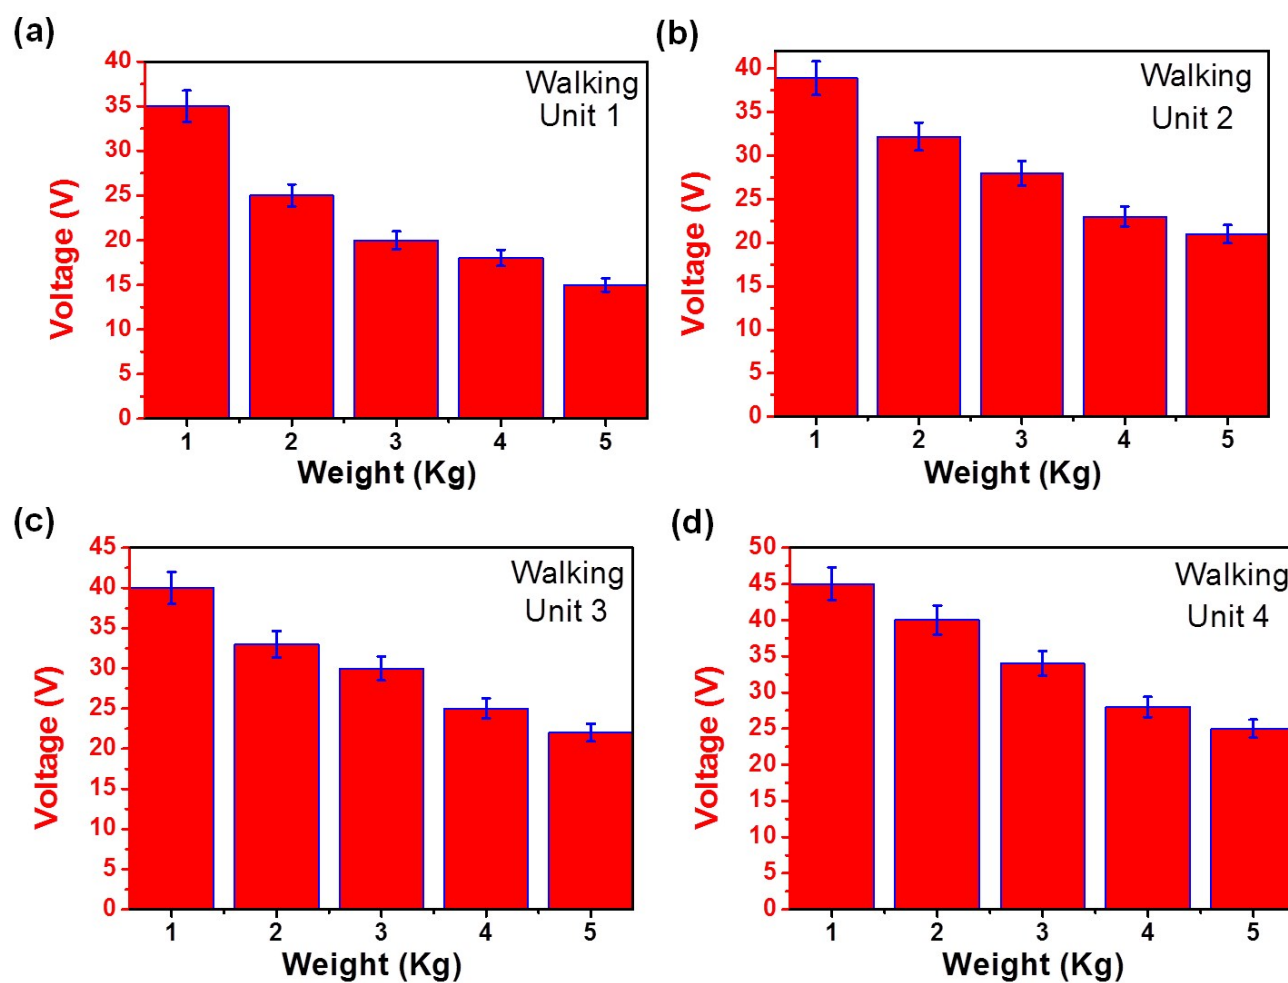

**Figure S10.** (a-d) Output voltage of multi-unit SBP-TENG with respect to walking motion vs different bag weight with error limits of real time bio-mechanical energy.

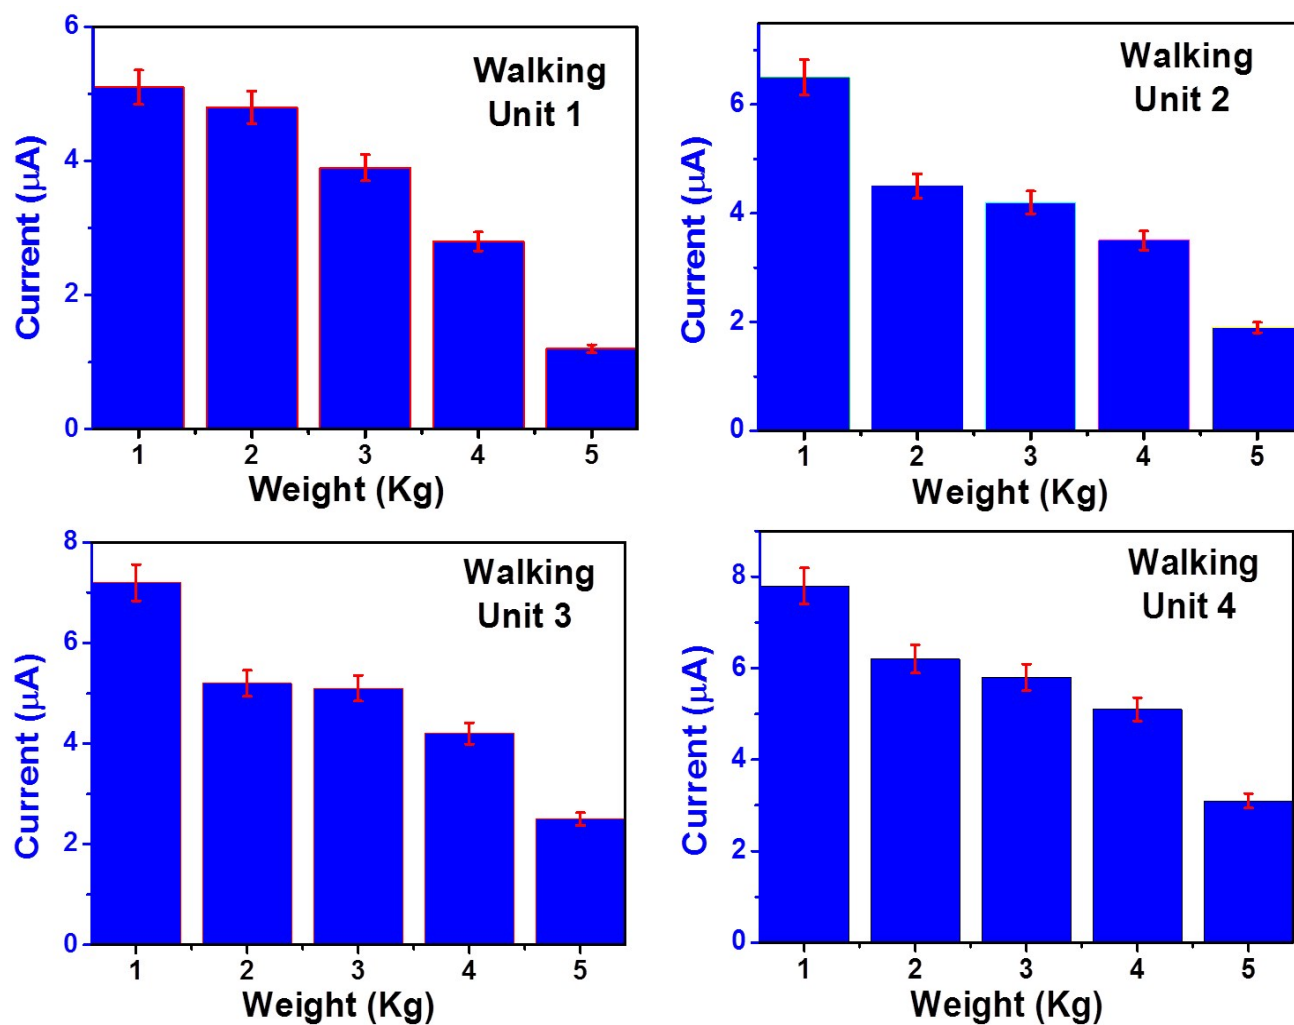

**Figure S11.** (a-d) Output current of multi-unit SBP-TENG with respect to walking motion *vs*

Different bag weight with error limits of real time bio-mechanical energy.

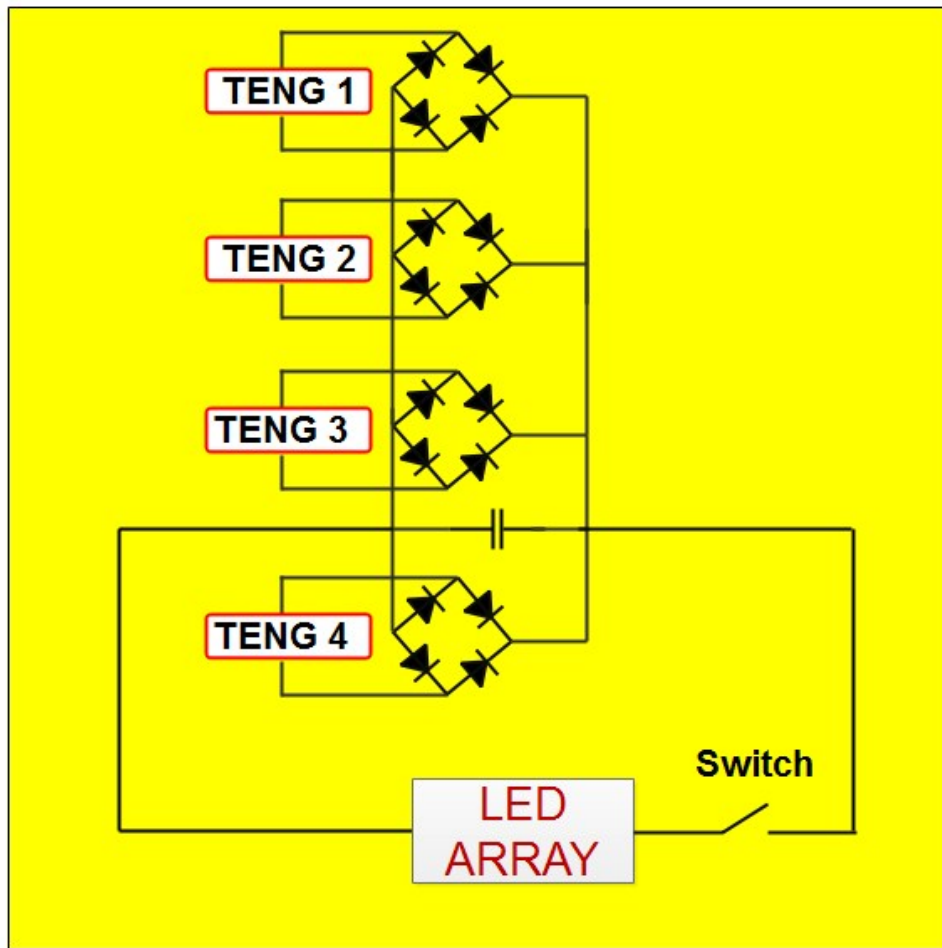

**Figure S12.** Self-powered emergency LED light switching circuit



## References

- 1 X. Wang, H. Zhang, L. Dong, X. Han, W. Du, J. Zhai, C. Pan and Z. L. Wang, *Adv. Mater.*, 2016, **28**, 2896–2903.
- 2 J. Luo, W. Tang, F. R. Fan, C. Liu, Y. Pang, G. Cao and Z. L. Wang, *ACS Nano*, 2016, **10**, 8078–8086.
- 3 Q. Zheng, Y. Zou, Y. Zhang, Z. Liu, B. Shi, X. Wang, Y. Jin, H. Ouyang, Z. Li and Z. L. Wang, *Sci. Adv.*, 2016, **2**.
- 4 J. Chen, G. Zhu, J. Yang, Q. Jing, P. Bai, W. Yang, X. Qi, Y. Su and Z. L. Wang, *ACS Nano*, 2015, **9**, 105–116.
- 5 F. Yi, L. Lin, S. Niu, P. K. Yang, Z. Wang, J. Chen, Y. Zhou, Y. Zi, J. Wang, Q. Liao, Y. Zhang and Z. L. Wang, *Adv. Funct. Mater.*, 2015, **25**, 3688–3696.
- 6 W. Yang, J. Chen, X. Wen, Q. Jing, J. Yang, Y. Su, G. Zhu, W. Wu and Z. L. Wang, *ACS Appl. Mater. Interfaces*, 2014, **6**, 7479–84.
- 7 A. Chandrasekhar, N. R. Alluri, B. Saravanakumar, S. Selvarajan and S. J. Kim, *ACS Appl. Mater. Interfaces*, 2016.
